# Supplementary material
Source: Springer Nature journal article supplement (https://www.springermedizin.de/resource/supplementary/12936_2011_1694_MOESM2_ESM.pdf/9541526)

IgG to GLURP-R0

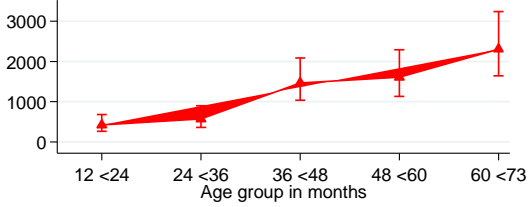

IgG to GLURP-R2

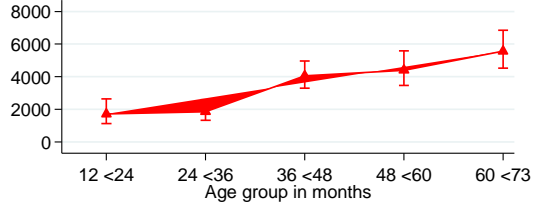

IgG to MSP1-3D7

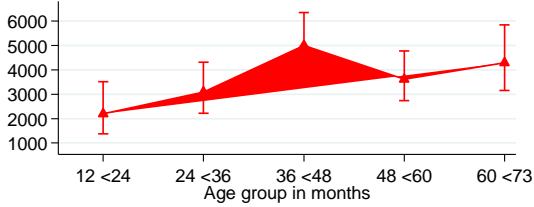

IgG to MSP1-FVO

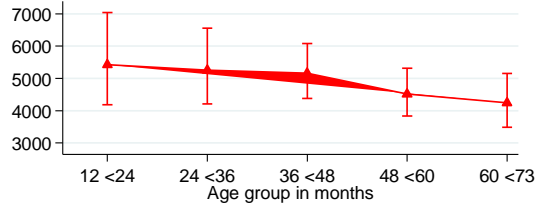

IgG to MSP3-FVO

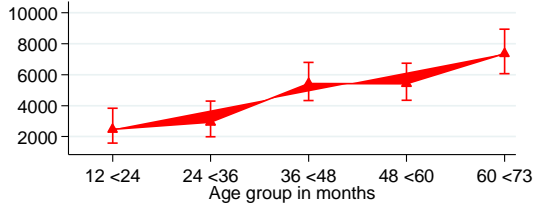

IgG to AMA1-FVO

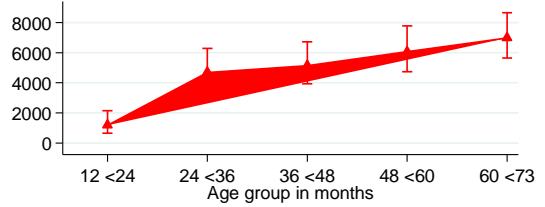

IgG to AMA1-LR32

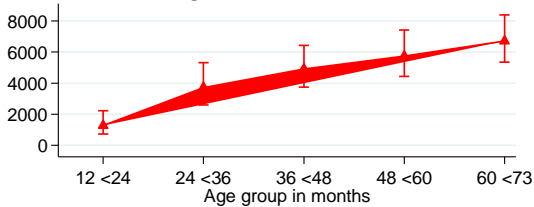

IgG to AMA1-3D7

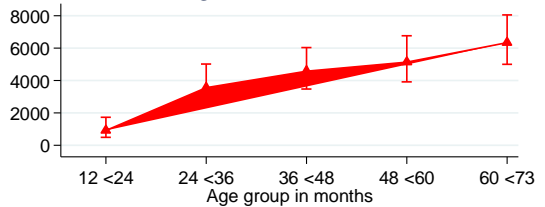

IgG to EBA-175

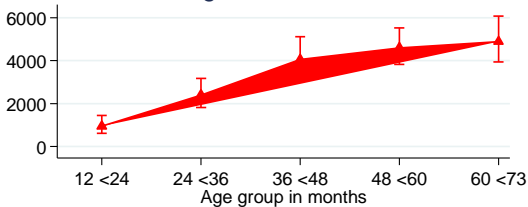

IgG to LSA-1

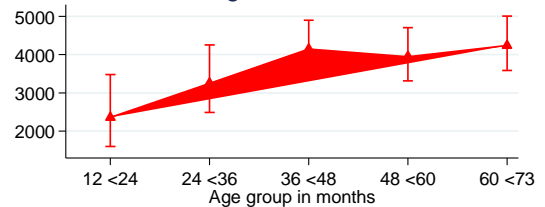

Supplement: MOESM2 [file 9541526]
